# Supplementary material for: Measurement Invariance of Three Narcissism Questionnaires Across the United States, the United Kingdom, and Germany
Source: PubMed Central journal article supplement — Assessment. 2020 May 5;28(1):29–43. doi: 10.1177/1073191120907967 (PMC7783690; doi:10.1177/1073191120907967), 2020-05-05
Supplement: Cross-cultural_MI_SOM_1_20190712_an.pdf [file Cross-cultural_MI_SOM_1_20190712_an.pdf]

**Supplemental Online Material 1**

**Measurement invariance of three narcissism questionnaires across the US, the UK, and Germany**

## Tables and Figures

### Tables

Table S1 *Descriptive statistics and omega reliabilities for the narcissism facets by country*

Table S2 *Observed correlations between narcissism facets in the US sample*

Table S3 *Standardized factor loadings from the configural invariance model for the B-PNI analysis of US, UK, and Germany*

Table S4 *Noninvariant parameters for the B-PNI analysis of US, UK, and Germany*

Table S5: *Observed mean differences and effect sizes for the B-PNI, NPI, and NARQ*

Table S6: *Correlations of trait estimates on the narcissism facets with age and sex for the strict and final partial invariance models*

Table S7 *Standardized factor loadings from the configural invariance model for the NPI analysis of US, UK, and Germany*

Table S8 *Noninvariant parameters for the NPI analysis of US, UK, and Germany*

Table S9 *Standardized factor loadings from the configural invariance model for the NARQ analysis with US, UK, and Germany*

Table S10 *Noninvariant parameters for the NARQ analysis with US, UK, and Germany*

### Figures

*Figure S1* Development in latent mean differences from strict invariance model (model number 0) to final partial invariance model for the B-PNI facet exploitativeness by country

*Figure S2* Development in latent mean differences from strict invariance model (model number 0) to final partial invariance model for the B-PNI facet self-sacrificing self-enhancement by country

*Figure S3* Development in latent mean differences from strict invariance model (model number 0) to final partial invariance model for the B-PNI facet grandiose fantasy by country

*Figure S4* Development in latent mean differences from strict invariance model (model number 0) to final partial invariance model for the B-PNI facet contingent self-esteem by country

*Figure S5* Development in latent mean differences from strict invariance model (model number 0) to final partial invariance model for the B-PNI facet hiding the self by country

*Figure S6* Development in latent mean differences from strict invariance model (model number 0) to final partial invariance model for the B-PNI facet devaluing by country

*Figure S7* Development in latent mean differences from strict invariance model (model number 0) to final partial invariance model for the B-PNI facet entitlement rage by country

*Figure S8* Development in latent mean differences from strict invariance model (model number 0) to final partial invariance model for the NPI facet leadership by country.

*Figure S9* Development in latent mean differences from strict invariance model (model number 0) to final partial invariance model for the NPI facet vanity by country.

*Figure S10* Development in latent mean differences from strict invariance model (model number 0) to final partial invariance model for the NPI facet entitlement by country.

*Figure S11* Development in latent mean differences from strict invariance model (model number 0) to final partial invariance model for the NARQ facet admiration by country.

*Figure S12* Development in latent mean differences from strict invariance model (model number 0) to final partial invariance model for the NARQ facet rivalry by country.

Table S1

*Descriptive statistics and omega reliabilities for the narcissism facets by sample*

| Questionnaire | Facet                        | Country       |          |                |          |             |          |
|---------------|------------------------------|---------------|----------|----------------|----------|-------------|----------|
|               |                              | United States |          | United Kingdom |          | Germany     |          |
|               |                              | M (SD)        | $\omega$ | M (SD)         | $\omega$ | M (SD)      | $\omega$ |
| B-PNI         | Exploitativeness             | 3.06 (1.24)   | 0.84     | 2.94 (1.14)    | 0.82     | 2.93 (1.08) | 0.81     |
| B-PNI         | Self-sacrificing enhancement | 3.34 (1.16)   | 0.75     | 3.02 (1.1)     | 0.73     | 2.68 (1.06) | 0.79     |
| B-PNI         | Grandiose fantasy            | 3.49 (1.35)   | 0.83     | 3.49 (1.36)    | 0.83     | 3.44 (1.24) | 0.83     |
| B-PNI         | Contingent self-esteem       | 2.96 (1.28)   | 0.83     | 2.99 (1.26)    | 0.81     | 2.76 (1.18) | 0.83     |
| B-PNI         | Hiding the self              | 3.77 (1.26)   | 0.78     | 3.67 (1.25)    | 0.81     | 3.19 (1.21) | 0.81     |
| B-PNI         | Devaluing                    | 2.57 (1.09)   | 0.72     | 2.45 (1.02)    | 0.70     | 2.44 (1.06) | 0.81     |
| B-PNI         | Entitlement rage             | 2.73 (1.17)   | 0.79     | 2.67 (1.15)    | 0.77     | 2.53 (1.02) | 0.77     |
| NPI           | Leadership                   | 0.31 (0.22)   | 0.85     | 0.26 (0.2)     | 0.84     | 0.37 (0.2)  | 0.81     |
| NPI           | Vanity                       | 0.29 (0.23)   | 0.79     | 0.25 (0.22)    | 0.79     | 0.34 (0.22) | 0.75     |
| NPI           | Entitlement                  | 0.22 (0.22)   | 0.75     | 0.21 (0.21)    | 0.75     | 0.29 (0.22) | 0.70     |
| NARQ          | Admiration                   | 3.08 (0.97)   | 0.86     | 2.82 (0.96)    | 0.86     | 2.79 (0.94) | 0.87     |
| NARQ          | Rivalry                      | 2.35 (0.93)   | 0.84     | 2.34 (0.93)    | 0.84     | 2.15 (0.78) | 0.83     |

*Note.* B-PNI = Brief Pathological Narcissism Inventory, NPI = Narcissistic Personality

Inventory, NARQ = Narcissistic Admiration and Rivalry Questionnaire.

Table S2

*Observed correlations between narcissism facets in the US sample*

|             | <b>B-PNI</b> |             |             |             |             |             |             | <b>NPI</b>  |            |            | <b>NARQ</b> |
|-------------|--------------|-------------|-------------|-------------|-------------|-------------|-------------|-------------|------------|------------|-------------|
|             | <b>EXPL</b>  | <b>SSSE</b> | <b>GRFA</b> | <b>COSE</b> | <b>HIDE</b> | <b>DEVA</b> | <b>ENTI</b> | <b>LEAD</b> | <b>VAN</b> | <b>ENT</b> | <b>ADM</b>  |
| <b>SSSE</b> | 0.32         |             |             |             |             |             |             |             |            |            |             |
| <b>GRFA</b> | 0.35         | 0.50        |             |             |             |             |             |             |            |            |             |
| <b>COSE</b> | 0.20         | 0.48        | 0.50        |             |             |             |             |             |            |            |             |
| <b>HIDE</b> | 0.21         | 0.30        | 0.34        | 0.40        |             |             |             |             |            |            |             |
| <b>DEVA</b> | 0.27         | 0.43        | 0.40        | 0.52        | 0.48        |             |             |             |            |            |             |
| <b>ENTI</b> | 0.46         | 0.50        | 0.54        | 0.60        | 0.35        | 0.59        |             |             |            |            |             |
| <b>LEAD</b> | 0.68         | 0.27        | 0.34        | 0.11        | 0.10        | 0.18        | 0.48        |             |            |            |             |
| <b>VAN</b>  | 0.41         | 0.26        | 0.36        | 0.31        | 0.03        | 0.21        | 0.47        | 0.58        |            |            |             |
| <b>ENT</b>  | 0.55         | 0.28        | 0.40        | 0.35        | 0.18        | 0.29        | 0.59        | 0.69        | 0.71       |            |             |
| <b>ADM</b>  | 0.59         | 0.40        | 0.46        | 0.24        | 0.08        | 0.27        | 0.55        | 0.70        | 0.65       | 0.57       |             |
| <b>RIV</b>  | 0.43         | 0.35        | 0.48        | 0.49        | 0.32        | 0.46        | 0.67        | 0.45        | 0.43       | 0.60       | 0.48        |

*Note.* EXPL = exploitativeness, SSSE = self-sacrificing self-enhancement, GRFA = grandiose fantasy, COSE = contingent self-esteem, HIDE = hiding the self, DEVA = devaluing, ENTI = entitlement rage, LEAD = leadership, VAN = vanity, ENT = entitlement, ADM = admiration, RIV = rivalry.

Table S3

*Standardized factor loadings from the configural invariance model for the B-PNI analysis of US, UK, and Germany*

| Facet                             | Item   | Standardized factor loading |      |         |
|-----------------------------------|--------|-----------------------------|------|---------|
|                                   |        | US                          | UK   | Germany |
| Exploitativeness                  | BPNI1  | 0.78                        | 0.80 | 0.67    |
|                                   | BPNI4  | 0.90                        | 0.89 | 0.81    |
|                                   | BPNI6  | 0.90                        | 0.70 | 0.90    |
|                                   | BPNI11 | 0.50                        | 0.63 | 0.59    |
| Self-sacrificing self-enhancement | BPNI10 | 0.72                        | 0.75 | 0.80    |
|                                   | BPNI12 | 0.52                        | 0.50 | 0.53    |
|                                   | BPNI19 | 0.75                        | 0.69 | 0.78    |
|                                   | BPNI24 | 0.64                        | 0.58 | 0.68    |
|                                   | BPNI13 | 0.71                        | 0.67 | 0.67    |
| Grandiose fantasy                 | BPNI17 | 0.86                        | 0.90 | 0.88    |
|                                   | BPNI25 | 0.68                        | 0.59 | 0.78    |
|                                   | BPNI26 | 0.86                        | 0.91 | 0.81    |
|                                   | BPNI2  | 0.78                        | 0.78 | 0.72    |
| Contingent self-esteem            | BPNI16 | 0.85                        | 0.85 | 0.83    |
|                                   | BPNI18 | 0.70                        | 0.60 | 0.82    |
|                                   | BPNI21 | 0.71                        | 0.69 | 0.72    |
|                                   | BPNI3  | 0.73                        | 0.72 | 0.83    |
| Hiding the self                   |        |                             |      |         |

|                  |        |      |      |      |
|------------------|--------|------|------|------|
|                  | BPNI15 | 0.70 | 0.68 | 0.61 |
|                  | BPNI27 | 0.68 | 0.74 | 0.67 |
|                  | BPNI28 | 0.75 | 0.82 | 0.87 |
| Devaluing        | BPNI7  | 0.62 | 0.62 | 0.68 |
|                  | BPNI9  | 0.48 | 0.53 | 0.66 |
|                  | BPNI14 | 0.75 | 0.75 | 0.84 |
|                  | BPNI20 | 0.81 | 0.77 | 0.86 |
| Entitlement rage | BPNI5  | 0.70 | 0.68 | 0.70 |
|                  | BPNI8  | 0.70 | 0.65 | 0.71 |
|                  | BPNI22 | 0.77 | 0.75 | 0.82 |
|                  | BPNI23 | 0.73 | 0.76 | 0.67 |



Table S4

*Noninvariant parameters for the B-PNI analysis of US, UK, and Germany*

| <b>Model</b> | <b>Parameter</b>  | <b>Country</b> | <b>Modification index</b> | <b>Expected parameter change</b> | <b>Effect size</b> |
|--------------|-------------------|----------------|---------------------------|----------------------------------|--------------------|
| Strict       | [BPNI9\$4]        | D              | 58.53                     | 0.44                             | 0.66               |
| partial 1    | [BPNI9\$5]        | D              | 58.05                     | 0.43                             | 0.65               |
| partial 2    | [BPNI9\$3]        | D              | 50.73                     | 0.41                             | 0.62               |
| partial 3    | [BPNI1\$1]        | D              | 38.06                     | -0.45                            | -0.73              |
| partial 4    | [BPNI9\$2]        | D              | 32.82                     | 0.33                             | 0.50               |
| partial 5    | Deva BY<br>bpni20 | D              | 33.53                     | -0.30                            | NA                 |
| partial 6    | Hide BY<br>bpni3  | D              | 32.89                     | 0.28                             | NA                 |
| partial 7    | [BPNI4\$5]        | UK             | 29.48                     | 0.47                             | 0.77               |
| partial 8    | Hide BY<br>bpni28 | D              | 26.99                     | 0.43                             | NA                 |
| partial 9    | [BPNI22\$5]       | D              | 23.29                     | 0.27                             | 0.53               |
| partial 10   | [BPNI14\$5]       | D              | 22.03                     | 0.44                             | 0.61               |
| partial 11   | [BPNI11\$2]       | D              | 20.50                     | 0.25                             | 0.39               |
| partial 12   | [BPNI2\$3]        | D              | 19.88                     | -0.29                            | -0.46              |
| partial 13   | [BPNI2\$2]        | D              | 18.63                     | -0.29                            | -0.46              |
| partial 14   | [BPNI2\$4]        | D              | 16.82                     | -0.27                            | -0.43              |

|            |                   |    |       |       |       |
|------------|-------------------|----|-------|-------|-------|
| partial 15 | [BPNI2\$1]        | D  | 13.03 | -0.26 | -0.40 |
| partial 16 | [BPNI14\$1]       | D  | 12.84 | -0.33 | -0.45 |
| partial 17 | [BPNI17\$1]       | D  | 13.89 | -0.27 | -0.38 |
| partial 18 | [BPNI16\$5]       | UK | 12.16 | -0.37 | -0.50 |
| partial 19 | [BPNI26\$1]       | D  | 11.44 | 0.27  | 0.46  |
| partial 20 | [BPNI26\$2]       | D  | 13.59 | 0.30  | 0.49  |
| partial 21 | [BPNI3\$1]        | US | 11.21 | 0.26  | 0.42  |
| partial 22 | [BPNI4\$1]        | D  | 11.09 | -0.31 | -0.49 |
| partial 23 | [BPNI1\$2]        | D  | 13.15 | -0.27 | -0.41 |
| partial 24 | Expl BY<br>bpni6  | D  | 13.26 | -0.32 | NA    |
| partial 25 | [BPNI4\$2]        | D  | 11.47 | -0.36 | -0.52 |
| partial 26 | [BPNI26\$3]       | D  | 9.34  | 0.24  | 0.41  |
| partial 27 | Grfa BY<br>bpni26 | D  | 9.99  | -0.28 | NA    |
| partial 28 | [BPNI28\$4]       | D  | 8.59  | 0.26  | 0.39  |
| partial 29 | [BPNI3\$5]        | D  | 10.24 | 0.30  | 0.40  |
| partial 30 | [BPNI28\$3]       | D  | 12.42 | 0.33  | 0.47  |
| partial 31 | [BPNI28\$5]       | D  | 16.07 | 0.47  | 0.63  |
| partial 32 | [BPNI3\$4]        | D  | 17.47 | 0.43  | 0.54  |
| partial 33 | [BPNI28\$2]       | D  | 16.65 | 0.48  | 0.60  |
| partial 34 | [BPNI3\$3]        | D  | 10.60 | 0.36  | 0.44  |
| partial 35 | [BPNI4\$3]        | D  | 7.66  | -0.29 | -0.42 |

|            |                  |   |       |       |      |
|------------|------------------|---|-------|-------|------|
| partial 36 | Grfa BY<br>npi17 | D | 6.14  | -0.27 | NA   |
| partial 37 | [BPNI13\$5]      | D | 16.45 | 0.26  | 0.39 |

*Note.* EXPL = exploitativeness, SSSE = self-sacrificing self-enhancement, GRFA = grandiose fantasy, COSE = contingent self-esteem, HIDE = hiding the self, DEVA = devaluing, ENTI = entitlement rage, D = Germany. Facet name BY ... indicates a noninvariant factor loading. Items in brackets are noninvariant thresholds with \$1 = threshold 1, \$ = threshold 2 etc. The expected parameter change (EPC) given by Mplus for individual thresholds reflects the difference between the (constrained) estimate of the parameter in the current model and the estimate of the parameter for this group if it were freed. Thus, it does not directly reflect the difference in parameter estimates between one group and the combined other groups. This group difference (column effect size) was calculated from the EPC values for all groups by subtracting the mean of the EPCs for the other groups from the EPC for the group of interest. This effect size was compared to the cut-off criterion of 0.375 for thresholds.

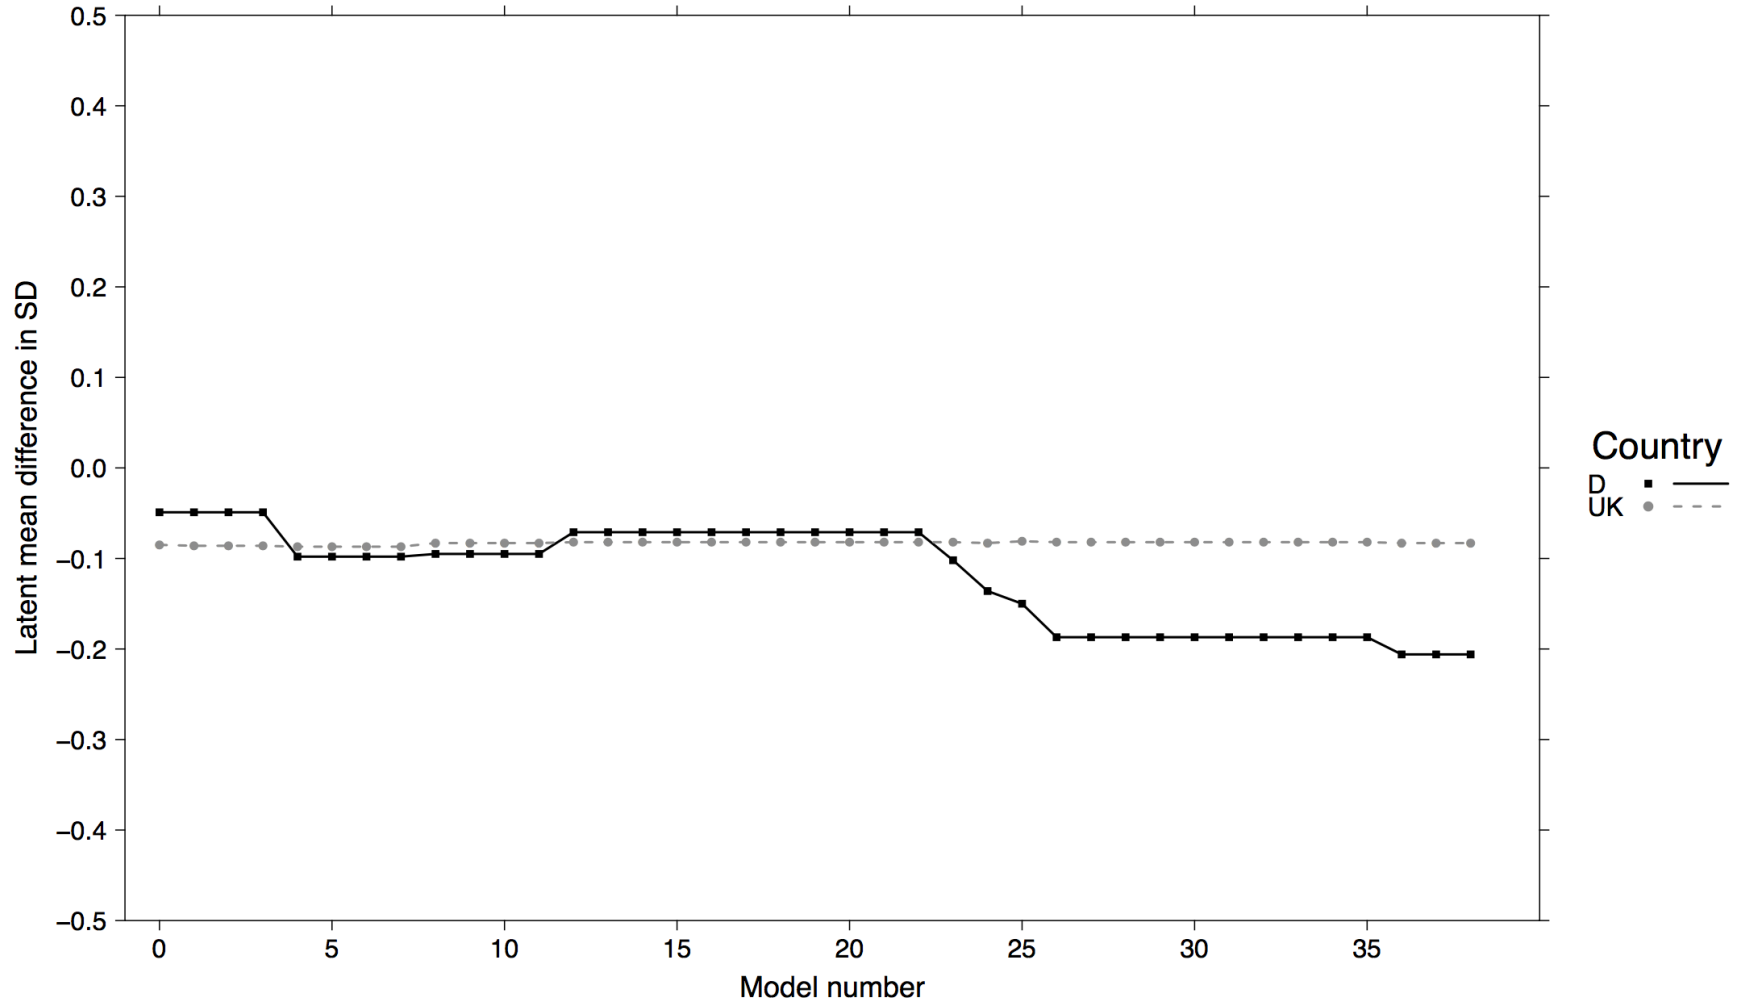

Figure S1. Development in latent mean differences from strict invariance model (model number 0) to final partial invariance model for the B-PNI facet exploitativeness by country.

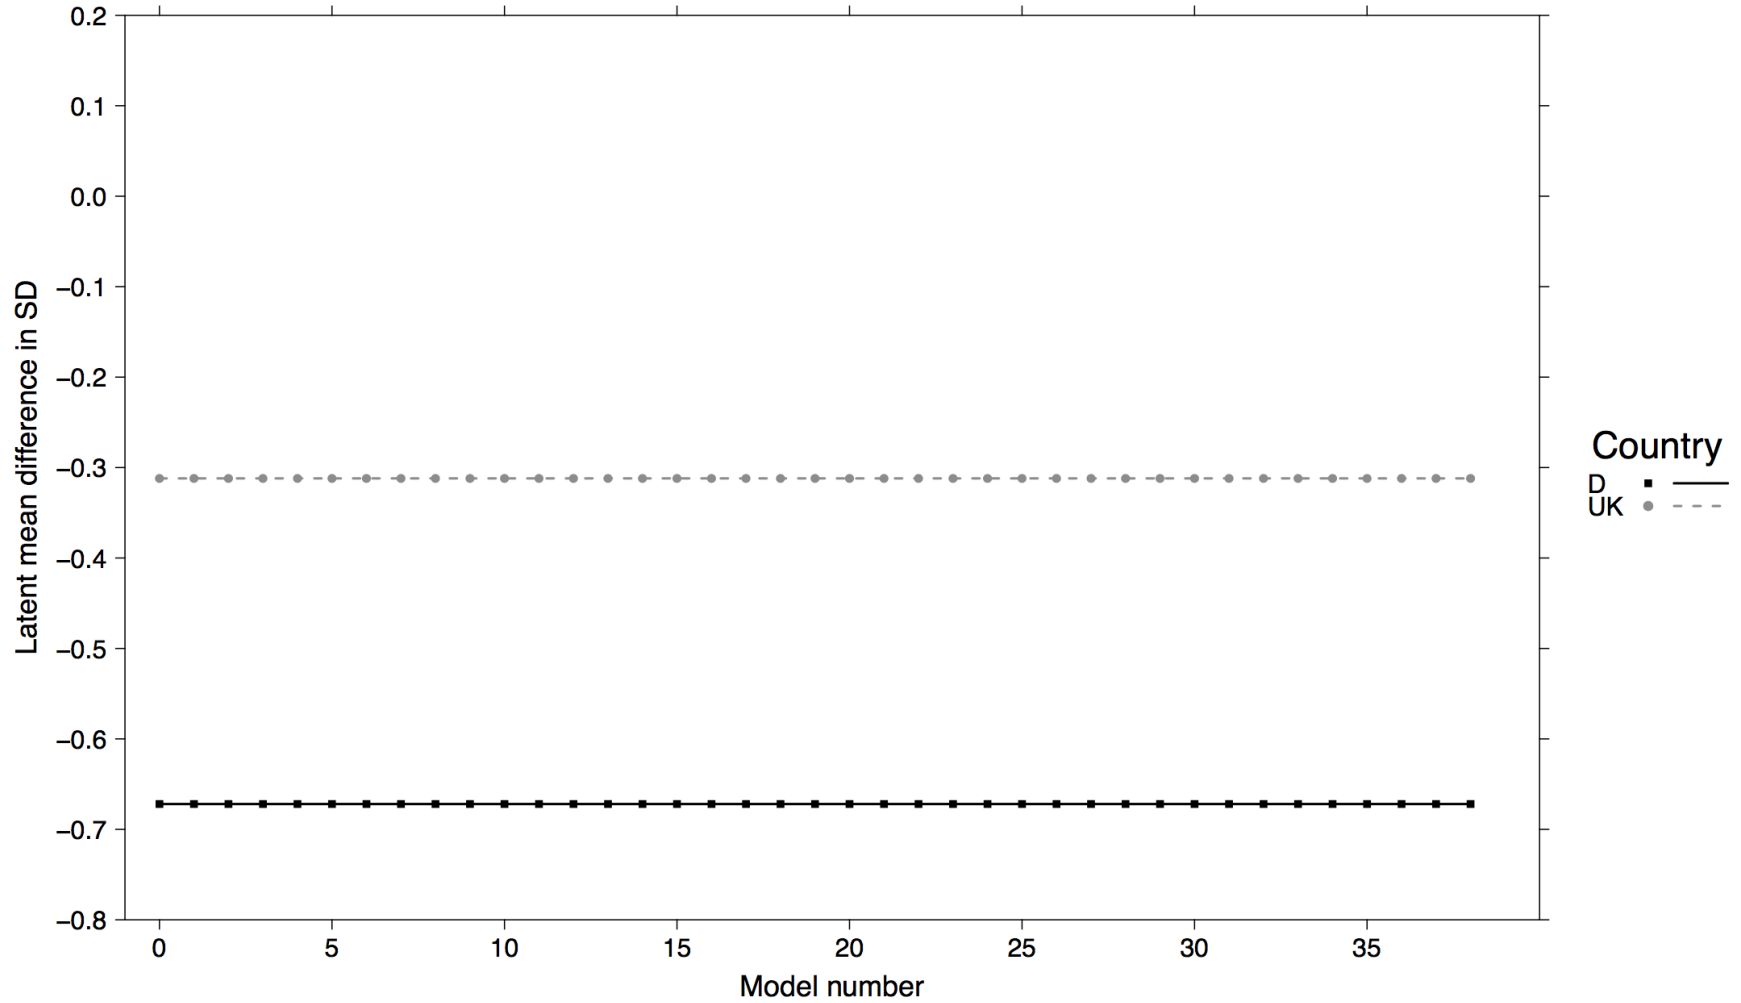

Figure S2. Development in latent mean differences from strict invariance model (model number 0) to final partial invariance model for the B-PNI facet self-sacrificing self-enhancement by country.

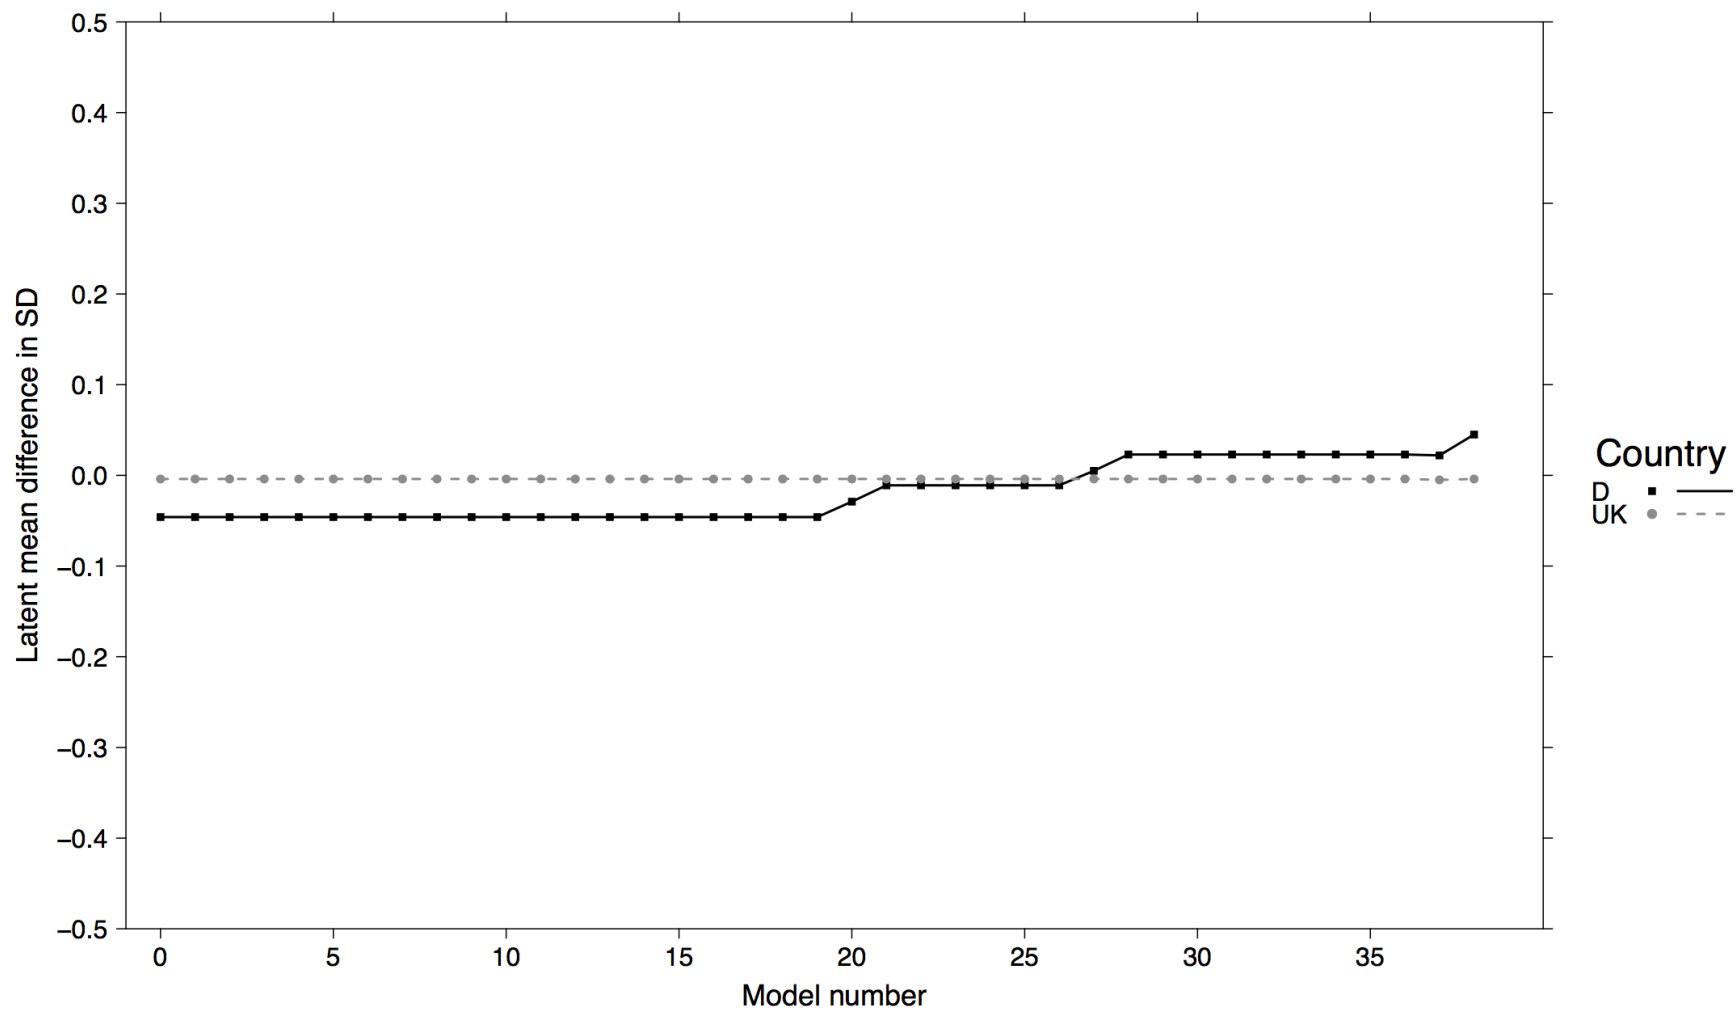

Figure S3. Development in latent mean differences from strict invariance model (model number 0) to final partial invariance model for the B-PNI facet grandiose fantasy by country.

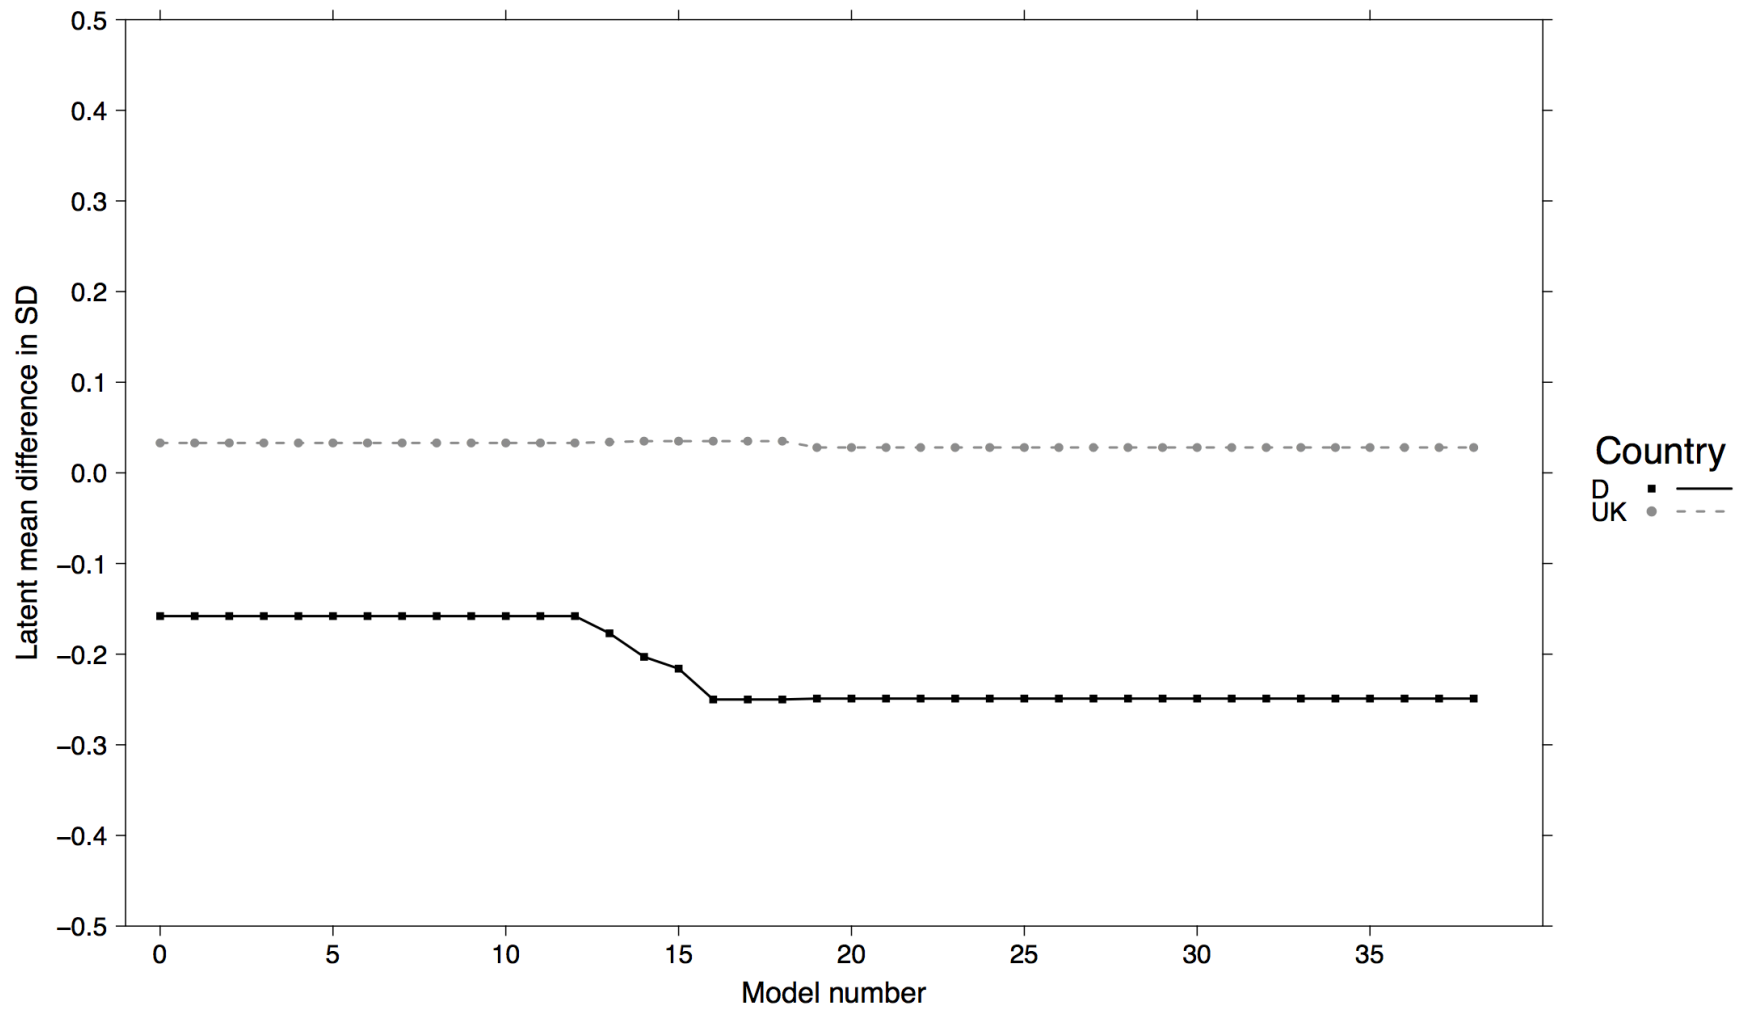

Figure S4. Development in latent mean differences from strict invariance model (model number 0) to final partial invariance model for the B-PNI facet contingent self-esteem by country.

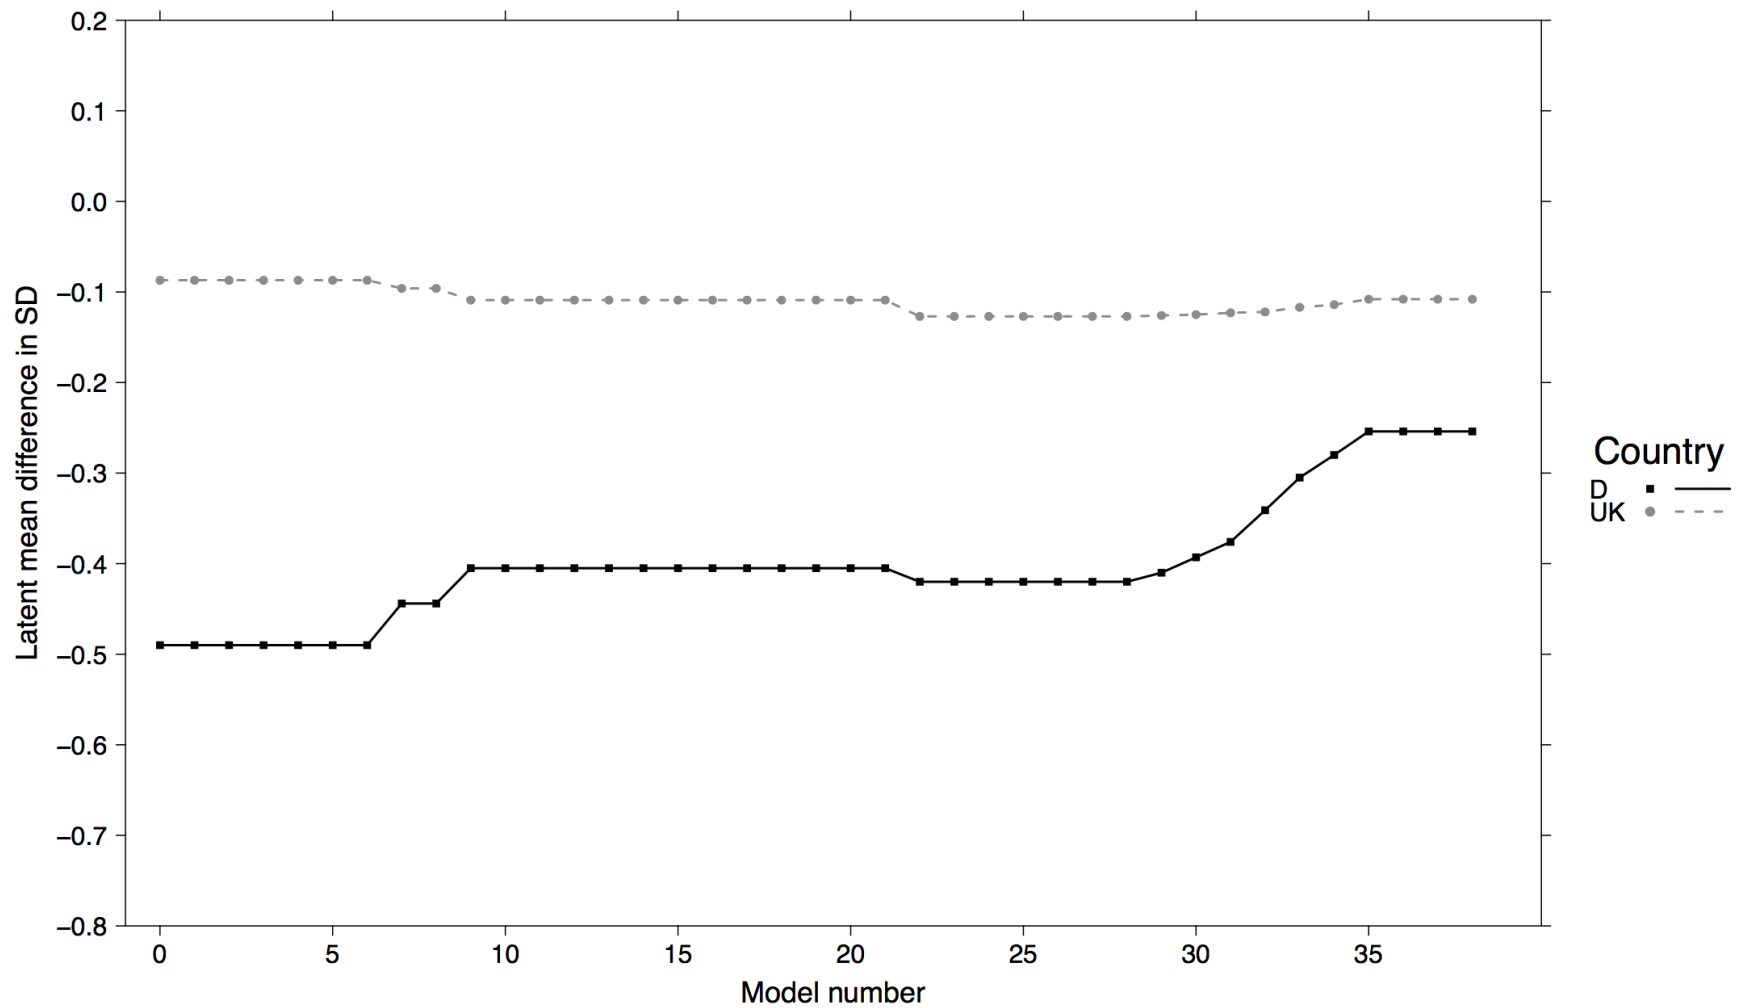

Figure S5. Development in latent mean differences from strict invariance model (model number 0) to final partial invariance model for the B-PNI facet hiding the self by country.



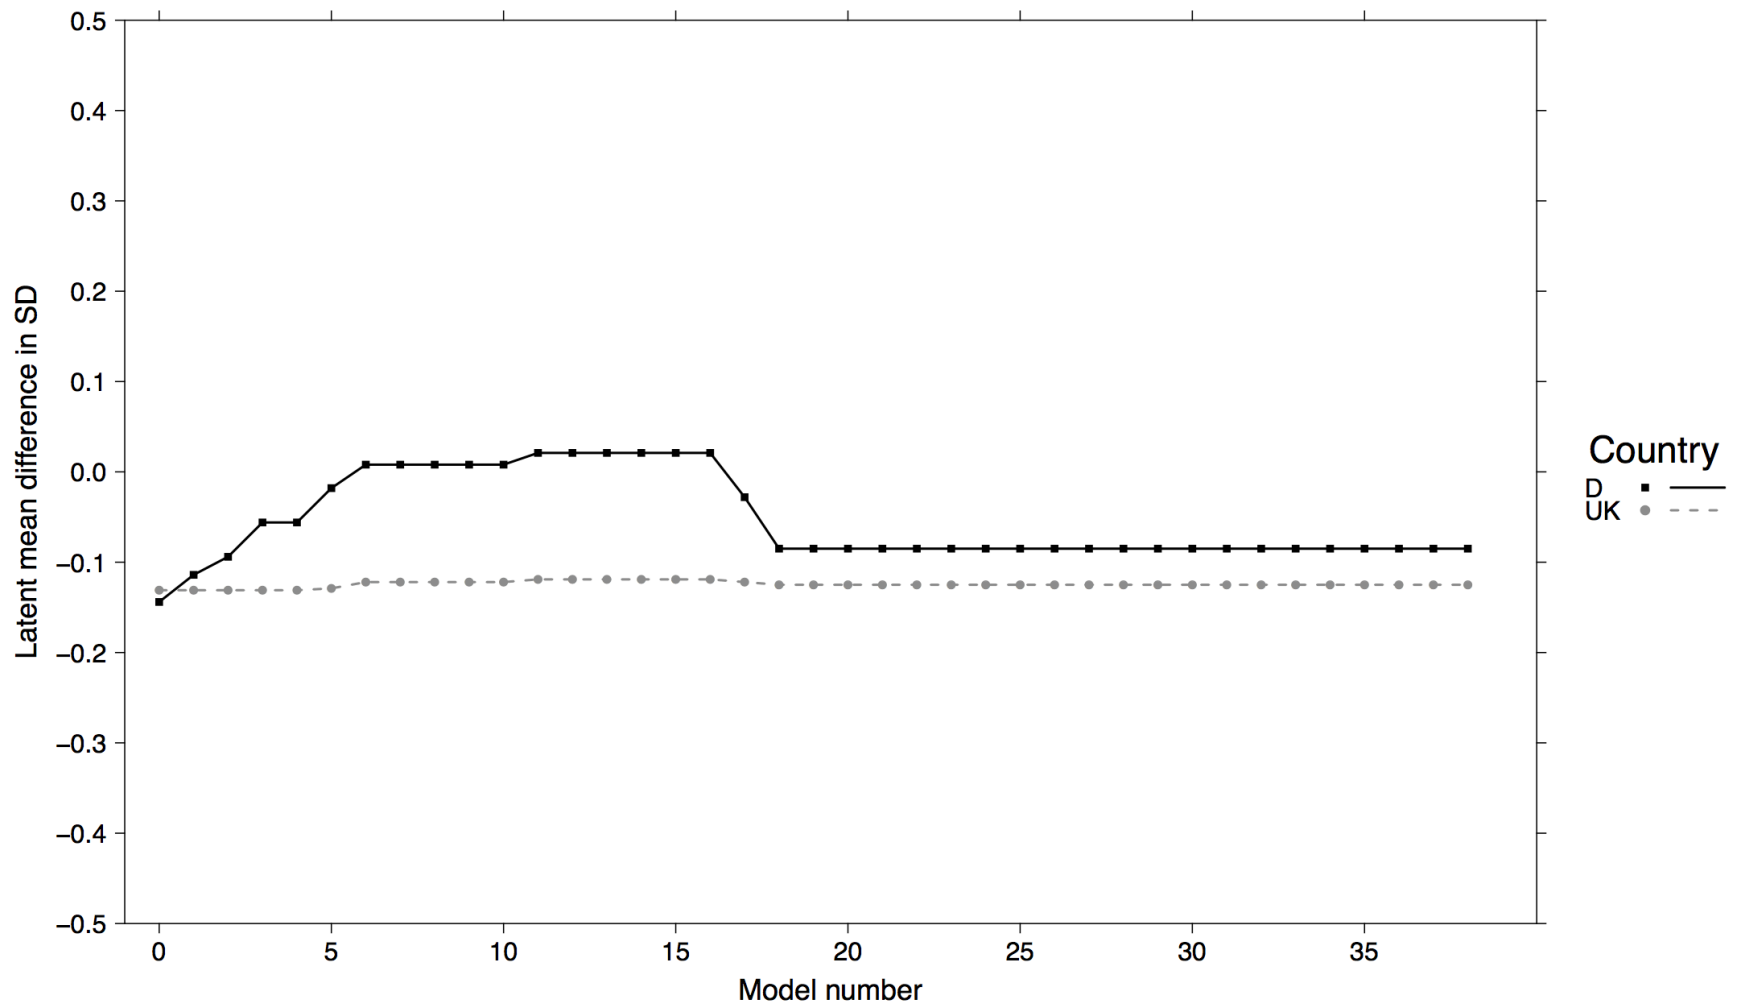

Figure S6. Development in latent mean differences from strict invariance model (model number 0) to final partial invariance model for the B-PNI facet devaluing by country.

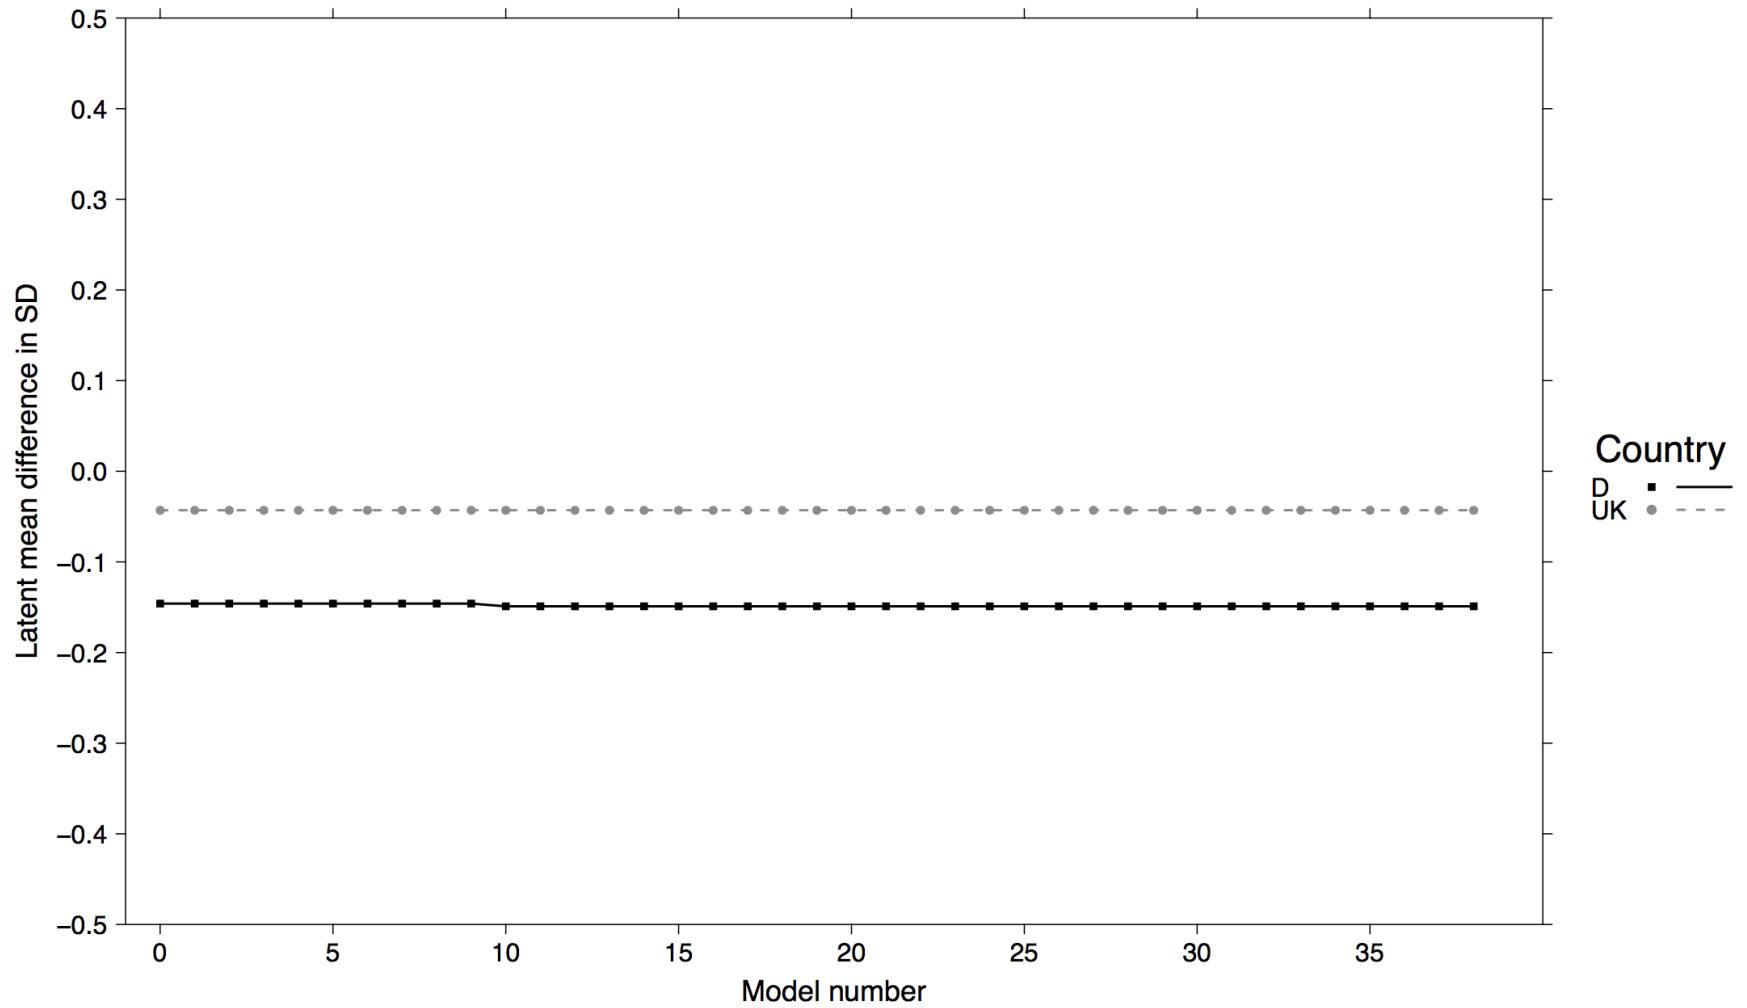

Figure S7. Development in latent mean differences from strict invariance model (model number 0) to final partial invariance model for the B-PNI facet entitlement rage by country.

Table S5

*Observed mean differences and effect sizes for the B-PNI, NPI, and NARQ*

| Questionnaire | Facet                             | UK – UK         |                     | US – D          |                      |
|---------------|-----------------------------------|-----------------|---------------------|-----------------|----------------------|
|               |                                   | Mean difference | Cohen's <i>d</i>    | Mean difference | Cohen's <i>d</i>     |
| B-PNI         | Exploitativeness                  | -0.12           | -0.10 [-0.22, 0.02] | -0.13           | -0.11 [-0.19, -0.02] |
|               | Self-sacrificing self-enhancement | -0.32           | -0.28 [-0.4, -0.16] | -0.67           | -0.58 [-0.67, -0.5]  |
|               | Grandiose fantasy                 | -0.01           | -0.01 [-0.13, 0.11] | -0.05           | -0.04 [-0.12, 0.04]  |
|               | Contingent self-esteem            | 0.02            | 0.02 [-0.1, 0.14]   | -0.2            | -0.16 [-0.24, -0.08] |
|               | Hiding the self                   | -0.09           | -0.08 [-0.19, 0.04] | -0.57           | -0.46 [-0.54, -0.37] |
|               | Devaluing                         | -0.12           | -0.11 [-0.23, 0]    | -0.13           | -0.12 [-0.2, -0.04]  |
|               | Entitlement rage                  | -0.05           | -0.05 [-0.16, 0.07] | -0.2            | -0.17 [-0.26, -0.09] |

|      |             |       |                      |       |                      |
|------|-------------|-------|----------------------|-------|----------------------|
| NPI  | Leadership  | -0.06 | -0.26 [-0.38, -0.14] | 0.05  | 0.25 [0.17, 0.33]    |
|      | Vanity      | -0.04 | -0.19 [-0.31, -0.07] | 0.05  | 0.23 [0.15, 0.31]    |
|      | Entitlement | -0.01 | -0.07 [-0.19, 0.05]  | 0.07  | 0.31 [0.23, 0.4]     |
| NARQ | Admiration  | -0.27 | -0.28 [-0.4, -0.16]  | -0.29 | -0.30 [-0.38, -0.22] |
|      | Rivalry     | 0     | -0.01 [-0.12, 0.11]  | -0.20 | -0.22 [-0.30, -0.14] |

---

*Note.* Cohen's  $d$  values for the NPI facets should be interpreted with caution. They differ rather strongly from the observed mean differences because the pooled standard deviations, which are in the denominator for calculating  $d$ , are very low.

Table S6

*Correlations of trait estimates on the narcissism facets with age and sex for the strict and final partial invariance models*

|                    |             | US     |      |         |      | UK     |       |         |       | D      |      |         |       |
|--------------------|-------------|--------|------|---------|------|--------|-------|---------|-------|--------|------|---------|-------|
|                    |             | Strict |      | Partial |      | Strict |       | Partial |       | Strict |      | Partial |       |
| Quest-<br>ionnaire | Facet       | Age    | Sex  | Age     | Sex  | Age    | Sex   | Age     | Sex   | Age    | Sex  | Age     | Sex   |
| <b>B-PNI</b>       | <b>EXPL</b> | -0.14  | 0.14 | -0.14   | 0.14 | -0.20  | 0.13  | -0.19   | 0.11  | -      | -    | -0.07   | -0.02 |
|                    | <b>SSSE</b> | -0.22  | 0.07 | -0.22   | 0.07 | -0.28  | 0.04  | -0.27   | 0.03  | -      | -    | -0.23   | 0.04  |
|                    | <b>GRFA</b> | -0.23  | 0.11 | -0.23   | 0.11 | -0.33  | 0.18  | -0.33   | 0.18  | -      | -    | -0.17   | 0.07  |
|                    | <b>COSE</b> | -0.21  | 0.02 | -0.21   | 0.01 | -0.33  | 0.02  | -0.34   | 0.02  | -      | -    | -0.18   | -0.03 |
|                    | <b>HIDE</b> | -0.16  | 0    | -0.16   | 0    | -0.23  | -0.01 | -0.23   | -0.01 | -      | -    | -0.08   | -0.06 |
|                    | <b>DEVA</b> | -0.16  | 0.03 | -0.15   | 0.03 | -0.16  | 0.02  | -0.16   | 0.03  | -      | -    | -0.12   | -0.02 |
|                    | <b>ENTI</b> | -0.18  | 0.07 | -0.17   | 0.07 | -0.27  | 0.10  | -0.26   | 0.09  | -      | -    | -0.19   | 0     |
| <b>NPI</b>         | <b>LEAD</b> | -0.09  | 0.16 | -0.10   | 0.16 | -0.11  | 0.12  | -0.12   | 0.12  | 0.01   | 0.11 | 0.02    | 0.11  |
|                    | <b>VAN</b>  | -0.16  | 0.04 | -0.16   | 0.04 | -0.16  | 0.06  | -0.15   | 0.06  | -0.04  | 0.01 | -0.04   | 0.01  |
|                    | <b>ENT</b>  | -0.14  | 0.15 | -0.15   | 0.15 | -0.17  | 0.18  | -0.17   | 0.18  | 0.01   | 0.07 | 0.02    | 0.07  |

|             |            |       |      |       |      |       |      |       |      |       |      |       |      |
|-------------|------------|-------|------|-------|------|-------|------|-------|------|-------|------|-------|------|
| <b>NARQ</b> | <b>ADM</b> | -0.14 | 0.13 | -0.15 | 0.13 | -0.2  | 0.11 | -0.21 | 0.12 | -0.06 | 0.14 | -0.05 | 0.13 |
|             | <b>RIV</b> | -0.16 | 0.15 | -0.16 | 0.15 | -0.28 | 0.24 | -0.28 | 0.24 | -0.14 | 0.19 | -0.14 | 0.19 |

*Note.* EXPL = exploitativeness, SSSE = self-sacrificing self-enhancement, GRFA = grandiose fantasy, COSE = contingent self-esteem, HIDE = hiding the self, DEVA = devaluing, ENTI = entitlement rage, LEAD = leadership, VAN = vanity, ENT = entitlement, ADM = admiration, RIV = rivalry. Sex is coded 0 = female, 1 = male. Correlations are based on maximum a posteriori (MAP) estimates. For Germany, MAPs could not be obtained in the strict model due to a non-positive definite matrix.

Table S7

*Standardized factor loadings from the configural invariance model for the NPI analysis of US, UK, and Germany*

| Facet      | Item  | Item content                                          | Standardized factor loading |      |         |
|------------|-------|-------------------------------------------------------|-----------------------------|------|---------|
|            |       |                                                       | US                          | UK   | Germany |
| Leadership | NPI1  | I have a natural talent for influencing people.       | 0.65                        | 0.63 | 0.65    |
|            | NPI5  | If I ruled the world it would be a much better place. | 0.64                        | 0.59 | 0.48    |
|            | NPI6  | I can usually talk my way out of anything.            | 0.27                        | 0.43 | -0.06   |
|            | NPI8  | I will be a success.                                  | 0.53                        | 0.56 | 0.47    |
|            | NPI9  | I think I am a special person.                        | 0.45                        | 0.53 | 0.32    |
|            | NPI10 | I see myself as a good leader.                        | 0.61                        | 0.56 | 0.78    |
|            | NPI11 | I am assertive.                                       | 0.52                        | 0.50 | 0.56    |
|            | NPI12 | I like having authority over people.                  | 0.48                        | 0.50 | 0.33    |
|            | NPI13 | I find it easy to manipulate people.                  | 0.42                        | 0.62 | 0.38    |
|            | NPI16 | I can read people like a book.                        | 0.45                        | 0.34 | 0.34    |
|            | NPI17 | I like to take responsibility for making decisions.   | 0.31                        | 0.33 | 0.45    |
|            | NPI21 | I always know what I am doing.                        | 0.57                        | 0.53 | 0.37    |
|            | NPI23 | Everybody likes to hear my stories.                   | 0.57                        | 0.63 | 0.56    |
|            | NPI27 | I have a strong will to power.                        | 0.70                        | 0.72 | 0.75    |
|            | NPI31 | I can live my life in any way I want to.              | 0.46                        | 0.56 | 0.39    |
|            | NPI32 | People always seem to recognize my authority.         | 0.70                        | 0.58 | 0.79    |
|            | NPI33 | I would prefer to be a leader.                        | 0.65                        | 0.56 | 0.70    |
|            | NPI34 | I am going to be a great person.                      | 0.46                        | 0.42 | 0.42    |

|             |       |                                                                          |      |      |      |
|-------------|-------|--------------------------------------------------------------------------|------|------|------|
|             | NPI35 | I can make anybody believe anything I want them to.                      | 0.68 | 0.61 | 0.49 |
|             | NPI36 | I am a born leader.                                                      | 0.75 | 0.71 | 0.63 |
|             | NPI39 | I am more capable than other people.                                     | 0.57 | 0.59 | 0.35 |
|             | NPI40 | I am an extraordinary person.                                            | 0.44 | 0.55 | 0.35 |
| Vanity      | NPI4  | I know that I am good because everybody keeps telling me so.             | 0.79 | 0.87 | 0.66 |
|             | NPI7  | I like to be the center of attention.                                    | 0.66 | 0.41 | 0.51 |
|             | NPI9  | I think I am a special person.                                           | 0.25 | 0.22 | 0.20 |
|             | NPI15 | I like to display my body.                                               | 0.65 | 0.63 | 0.72 |
|             | NPI19 | I like to look at my body.                                               | 0.58 | 0.53 | 0.68 |
|             | NPI20 | I am apt to show off if I get the chance.                                | 0.43 | 0.14 | 0.22 |
|             | NPI26 | I like to be complimented.                                               | 0.56 | 0.60 | 0.67 |
|             | NPI28 | I like to start new fads and fashions.                                   | 0.50 | 0.59 | 0.46 |
|             | NPI29 | I like to look at myself in the mirror.                                  | 0.55 | 0.69 | 0.63 |
|             | NPI30 | I really like to be the center of attention.                             | 0.65 | 0.38 | 0.52 |
|             | NPI37 | I wish somebody would someday write my biography.                        | 0.50 | 0.47 | 0.44 |
|             | NPI38 | I get upset when people don't notice how I look when I go out in public. | 0.53 | 0.44 | 0.43 |
|             | NPI40 | I am an extraordinary person.                                            | 0.27 | 0.24 | 0.17 |
| Entitlement | NPI2  | Modesty doesn't become me.                                               | 0.71 | 0.53 | 0.69 |
|             | NPI6  | I can usually talk my way out of anything.                               | 0.40 | 0.17 | 0.47 |
|             | NPI7  | I like to be the center of attention.                                    | 0.18 | 0.46 | 0.50 |
|             | NPI12 | I like having authority over people.                                     | 0.25 | 0.18 | 0.45 |
|             | NPI13 | I find it easy to manipulate people.                                     | 0.34 | 0.13 | 0.31 |



|  |       |                                                                          |      |      |      |
|--|-------|--------------------------------------------------------------------------|------|------|------|
|  | NPI14 | I insist upon getting the respect that is due me.                        | 0.60 | 0.65 | 0.23 |
|  | NPI20 | I am apt to show off if I get the chance.                                | 0.26 | 0.48 | 0.34 |
|  | NPI24 | I expect a great deal from other people.                                 | 0.43 | 0.50 | 0.45 |
|  | NPI25 | I will never be satisfied until I get all that I deserve.                | 0.72 | 0.59 | 0.56 |
|  | NPI30 | I really like to be the center of attention.                             | 0.16 | 0.56 | 0.47 |
|  | NPI38 | I get upset when people don't notice how I look when I go out in public. | 0.18 | 0.24 | 0.24 |

Table S8

*Noninvariant parameters for the NPI analysis of US, UK, and Germany*

| <b>Model</b> | <b>Parameter</b> | <b>Country</b> | <b>Modification<br/>index</b> | <b>Expected<br/>parameter<br/>change</b> |
|--------------|------------------|----------------|-------------------------------|------------------------------------------|
| strict       | [NPI35]          | D              | 44.02                         | 1.20                                     |
| partial 1    | [NPI27]          | D              | 22.16                         | -0.99                                    |
| partial 2    | ENT BY NPI14     | D              | 21.17                         | -0.40                                    |
| partial 3    | ENT BY NPI6      | D              | 20.75                         | -0.39                                    |
| partial 4    | [NPI8]           | D              | 16.25                         | 0.68                                     |
| partial 5    | [NPI21]          | D              | 17.01                         | 0.69                                     |
| partial 6    | LEAD BY NPI10    | D              | 16.63                         | 0.35                                     |
| partial 7    | [NPI23]          | D              | 15.73                         | 0.71                                     |
| partial 8    | LEAD BY NPI32    | D              | 13.93                         | 0.36                                     |
| partial 9    | [NPI5]           | US             | 9.97                          | -0.57                                    |
| partial 10   | LEAD BY NPI33    | D              | 9.63                          | 0.27                                     |
| partial 11   | VAN BY NPI4      | D              | 9.77                          | -0.47                                    |
| partial 12   | [NPI11]          | D              | 9.06                          | 0.50                                     |
| partial 13   | [NPI31]          | D              | 9.06                          | 0.49                                     |
| partial 14   | [NPI1]           | D              | 8.82                          | 0.56                                     |
| partial 15   | [NPI13]          | D              | 7.55                          | 0.63                                     |
| partial 16   | [NPI25]          | D              | 7.34                          | 0.58                                     |
| partial 17   | [NPI14]          | D              | 6.60                          | 0.43                                     |

|            |               |    |      |       |
|------------|---------------|----|------|-------|
| partial 18 | [NPI36]       | D  | 6.21 | 0.51  |
| partial 19 | LEAD BY NPI27 | D  | 5.89 | 0.29  |
| partial 20 | ENT BY NPI30  | US | 5.07 | -0.26 |

*Note.* D = Germany, Lead = leadership, Van = vanity, Ent = entitlement. Facet name BY ...

indicates noninvariant factor loadings. Items in brackets are noninvariant thresholds. For the NPI the expected parameter change of the item intercept is reported. This directly reflects the difference in parameter estimates between the group of interest and the other groups and can therefore be compared to the cut-off criterion of 0.375.

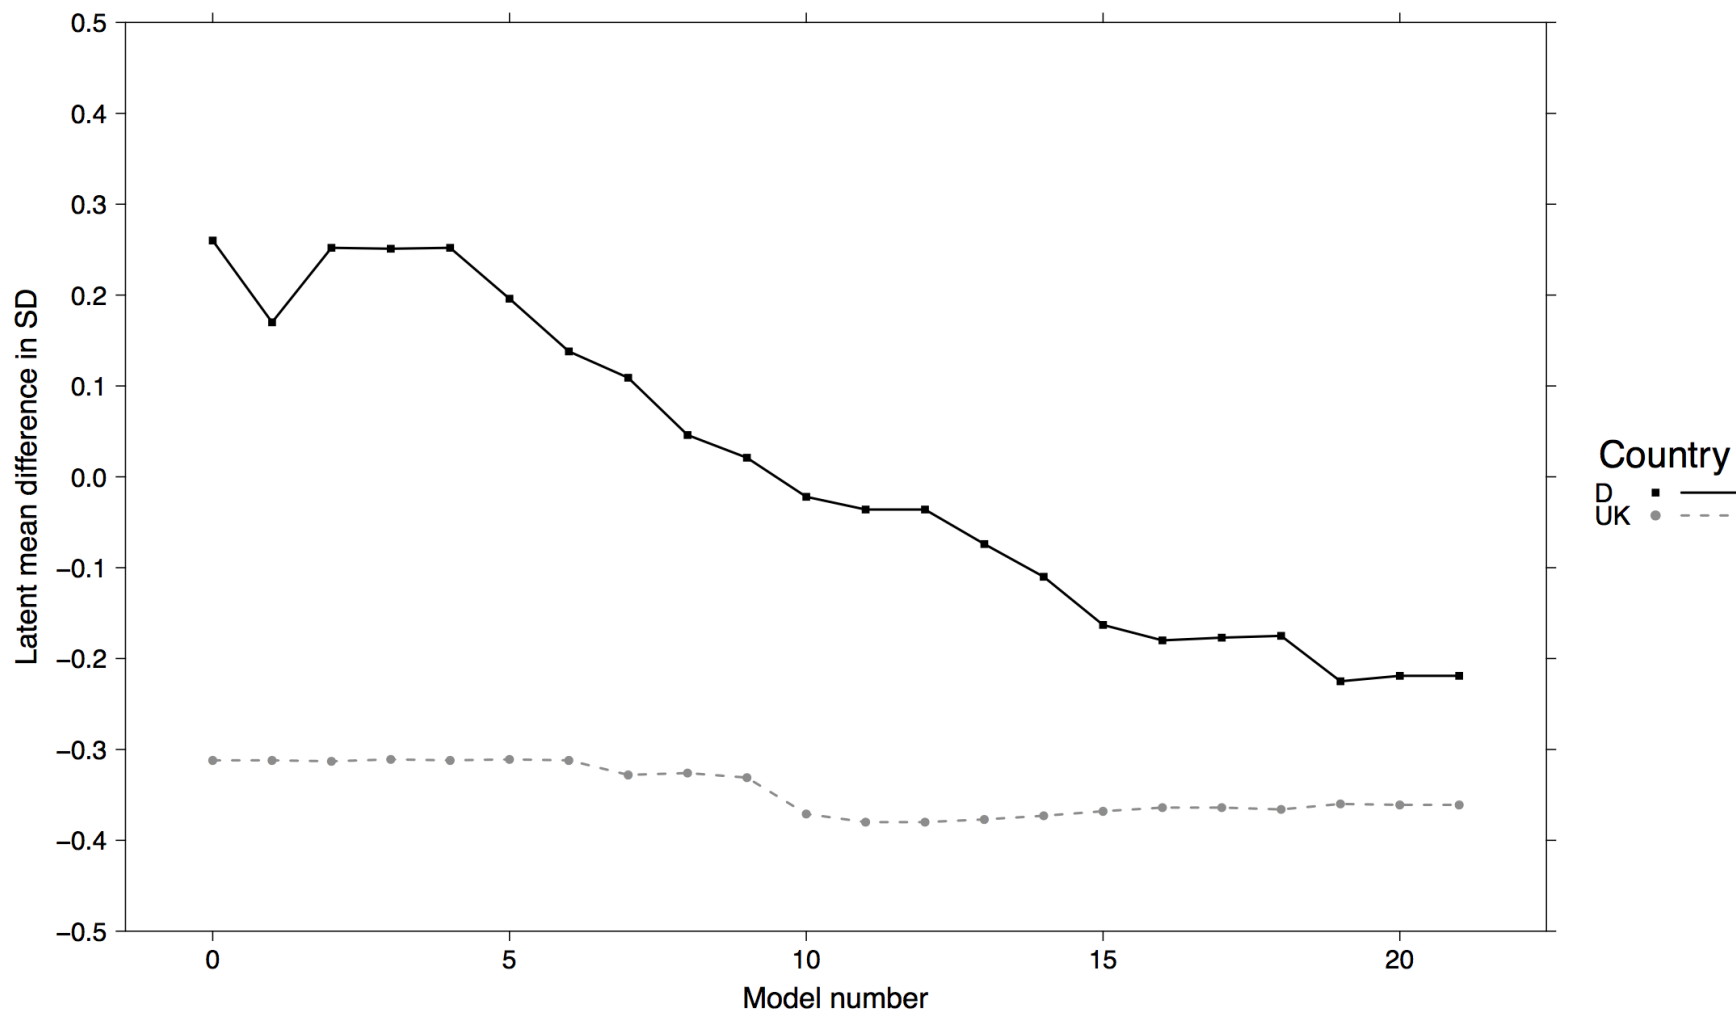

Figure S8. Development in latent mean differences from strict invariance model (model number 0) to final partial invariance model for the NPI facet leadership by country.

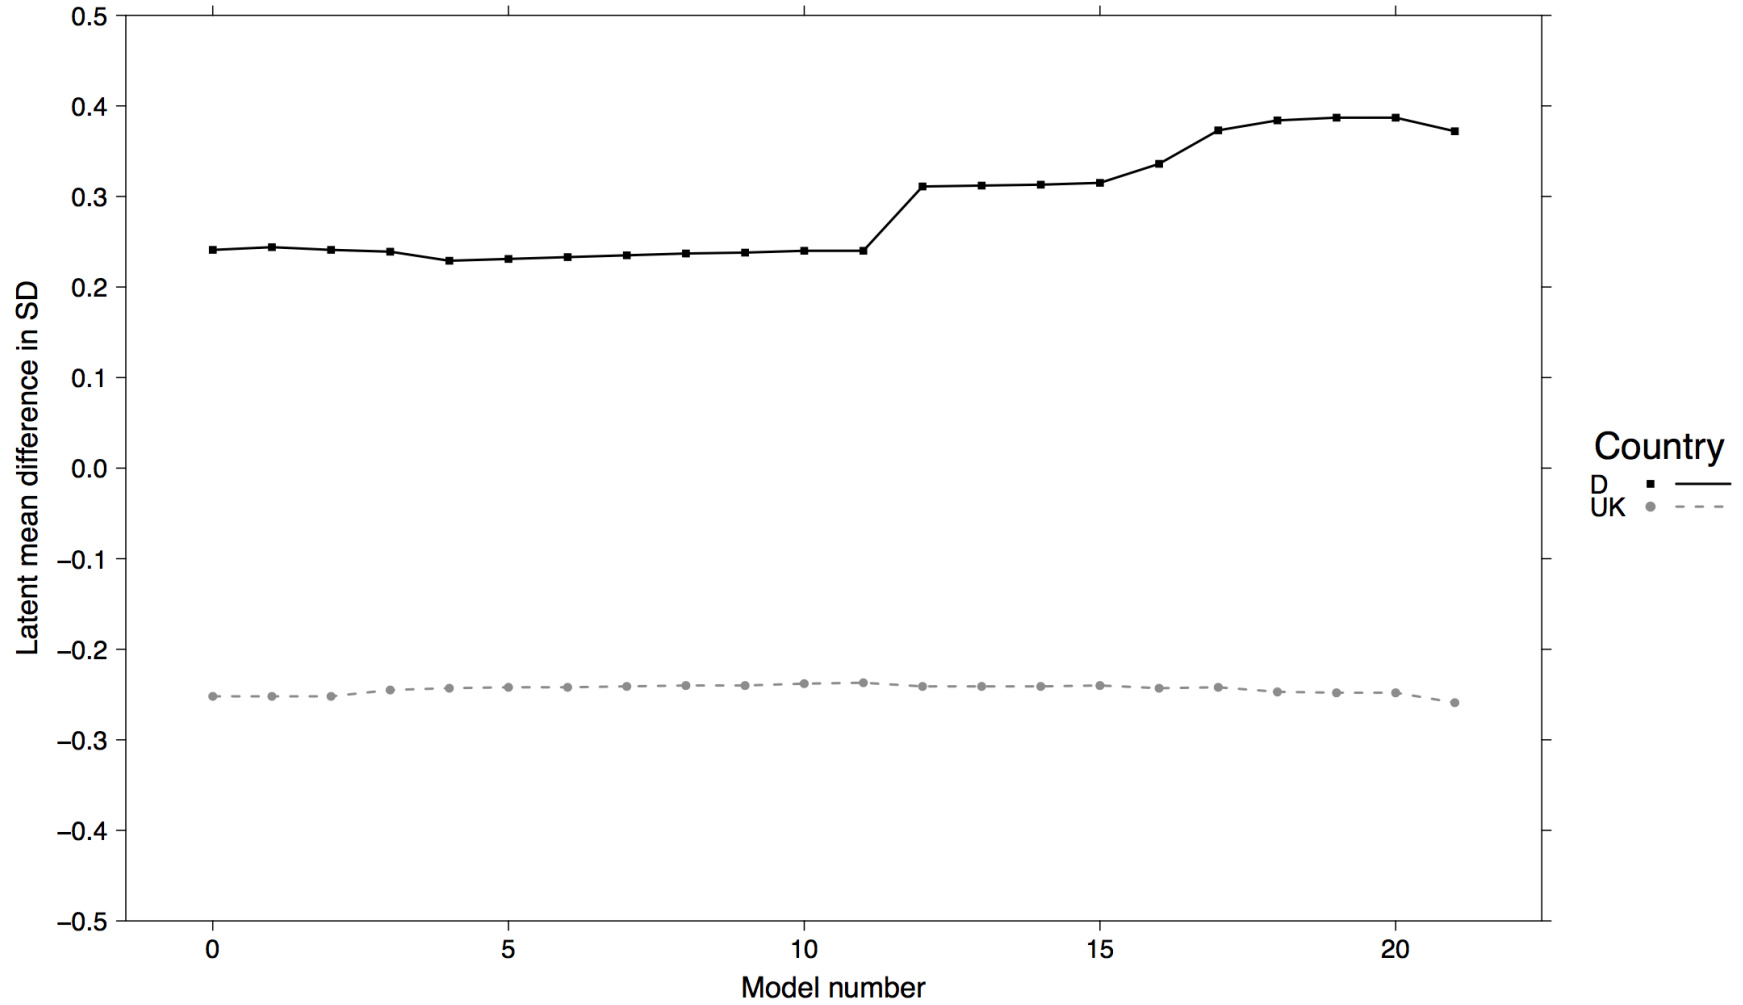

Figure S9. Development in latent mean differences from strict invariance model (model number 0) to final partial invariance model for the NPI facet vanity by country.

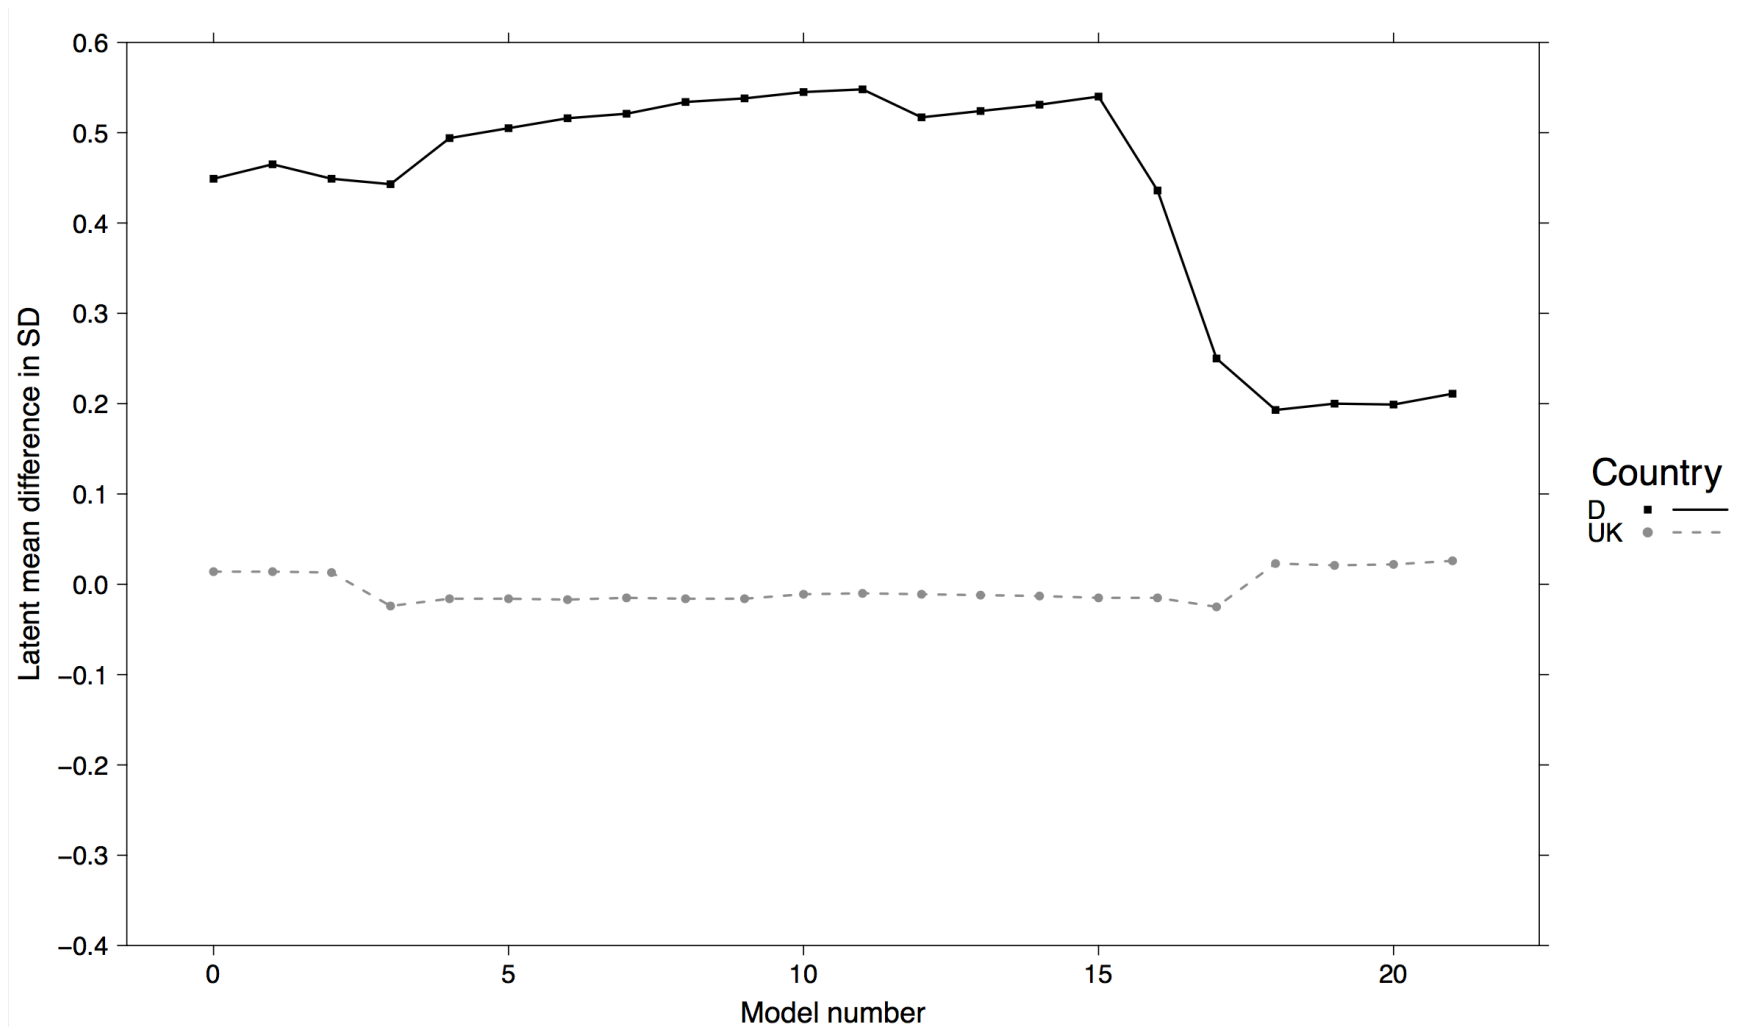

Figure S10. Development in latent mean differences from strict invariance model (model number 0) to final partial invariance model for the NPI facet entitlement by country.

Table S9

*Standardized factor loadings from the configural invariance model for the NARQ analysis with*

*US, UK, and Germany*

|              |             | <b>Standardized factor loading</b> |           |                |
|--------------|-------------|------------------------------------|-----------|----------------|
| <b>Facet</b> | <b>Item</b> | <b>US</b>                          | <b>UK</b> | <b>Germany</b> |
| Admiration   | NARQ1       | 0.60                               | 0.60      | 0.64           |
|              | NARQ2       | 0.64                               | 0.63      | 0.62           |
|              | NARQ3       | 0.79                               | 0.80      | 0.80           |
|              | NARQ5       | 0.54                               | 0.58      | 0.60           |
|              | NARQ7       | 0.66                               | 0.65      | 0.63           |
|              | NARQ8       | 0.78                               | 0.81      | 0.78           |
|              | NARQ15      | 0.77                               | 0.73      | 0.74           |
|              | NARQ16      | 0.81                               | 0.79      | 0.80           |
|              | NARQ18      | 0.32                               | 0.37      | 0.53           |
|              | Rivalry     | NARQ4                              | 0.72      | 0.71           |
| NARQ6        |             | 0.67                               | 0.68      | 0.72           |
| NARQ9        |             | 0.67                               | 0.71      | 0.69           |
| NARQ10       |             | 0.81                               | 0.83      | 0.70           |
| NARQ11       |             | 0.54                               | 0.62      | 0.33           |
| NARQ12       |             | 0.72                               | 0.67      | 0.64           |
| NARQ13       |             | 0.54                               | 0.50      | 0.59           |
| NARQ14       |             | 0.49                               | 0.47      | 0.68           |
|              | NARQ17      | 0.68                               | 0.58      | 0.68           |

Table S10

*Noninvariant parameters for the NARQ analysis with US, UK, and Germany*

| <b>Model</b> | <b>Parameter</b> | <b>Country</b> | <b>Modification index</b> | <b>Expected parameter change</b> | <b>Effect size</b> |
|--------------|------------------|----------------|---------------------------|----------------------------------|--------------------|
| strict       | RIV BY NARQ14    | D              | 100.82                    | -0.60                            | NA                 |
| partial01    | [NARQ4\$5]       | D              | 66.05                     | 0.56                             | 1.00               |
| partial02    | [NARQ18\$5]      | D              | 63.86                     | 0.48                             | 0.72               |
| partial03    | ADM BY NARQ18    | D              | 90.39                     | 0.28                             | NA                 |
| partial04    | [NARQ18\$4]      | D              | 61.26                     | 0.57                             | 0.77               |
| partial05    | [NARQ12\$1]      | D              | 61.04                     | -0.55                            | -0.84              |
| partial06    | [NARQ10\$1]      | D              | 37.69                     | -0.52                            | -0.78              |
| partial07    | ADM BY NARQ8     | D              | 36.27                     | -0.40                            | NA                 |
| partial08    | [NARQ18\$3]      | D              | 34.61                     | 0.44                             | 0.59               |
| partial09    | [NARQ11\$5]      | D              | 33.06                     | 0.36                             | 0.54               |
| partial10    | [NARQ8\$2]       | D              | 20.17                     | 0.34                             | 0.62               |
| partial11    | [NARQ8\$1]       | D              | 21.00                     | 0.36                             | 0.64               |
| partial12    | [NARQ12\$3]      | D              | 18.73                     | -0.30                            | -0.46              |
| partial13    | [NARQ18\$2]      | D              | 18.31                     | 0.33                             | 0.43               |
| partial14    | [NARQ12\$2]      | D              | 17.95                     | -0.30                            | -0.46              |
| partial15    | [NARQ14\$5]      | D              | 18.21                     | 0.23                             | 0.45               |
| partial16    | [NARQ14\$3]      | D              | 35.10                     | 0.33                             | 0.60               |
| partial17    | [NARQ14\$4]      | D              | 69.94                     | 0.52                             | 0.83               |



|           |             |   |       |       |       |
|-----------|-------------|---|-------|-------|-------|
| partial18 | [NARQ14\$2] | D | 96.66 | 0.68  | 0.99  |
| partial19 | [NARQ14\$1] | D | 47.86 | 0.53  | 0.72  |
| partial20 | [NARQ2\$1]  | D | 14.77 | -0.27 | -0.40 |
| partial21 | [NARQ10\$2] | D | 14.66 | -0.31 | -0.48 |
| partial22 | [NARQ12\$4] | D | 14.67 | -0.25 | -0.40 |
| partial23 | [NARQ9\$1]  | D | 14.58 | -0.28 | -0.42 |
| partial24 | [NARQ16\$2] | D | 14.06 | -0.33 | -0.49 |
| partial25 | [NARQ15\$1] | D | 13.30 | -0.30 | -0.45 |
| partial26 | [NARQ16\$1] | D | 15.12 | -0.36 | -0.51 |
| partial27 | [NARQ16\$3] | D | 11.82 | -0.31 | -0.45 |
| partial28 | [NARQ10\$3] | D | 10.26 | -0.25 | -0.40 |

*Note.* ADM = admiration, RIV = rivalry. Facet name BY ... indicates a noninvariant factor

loading. Items in brackets are noninvariant thresholds with \$1 = threshold 1, \$ = threshold 2 etc.

The expected parameter change (EPC) given by Mplus for individual thresholds reflects the difference between the (constrained) estimate of the parameter in the current model and the estimate of the parameter for this group if it were freed. Thus, it does not directly reflect the difference in parameter estimates between one group and the combined other groups. This group difference (column effect size) was calculated from the EPC values for all groups by subtracting the mean of the EPCs for the other groups from the EPC for the group of interest. This effect size was compared to the cut-off criterion of 0.375 for thresholds.

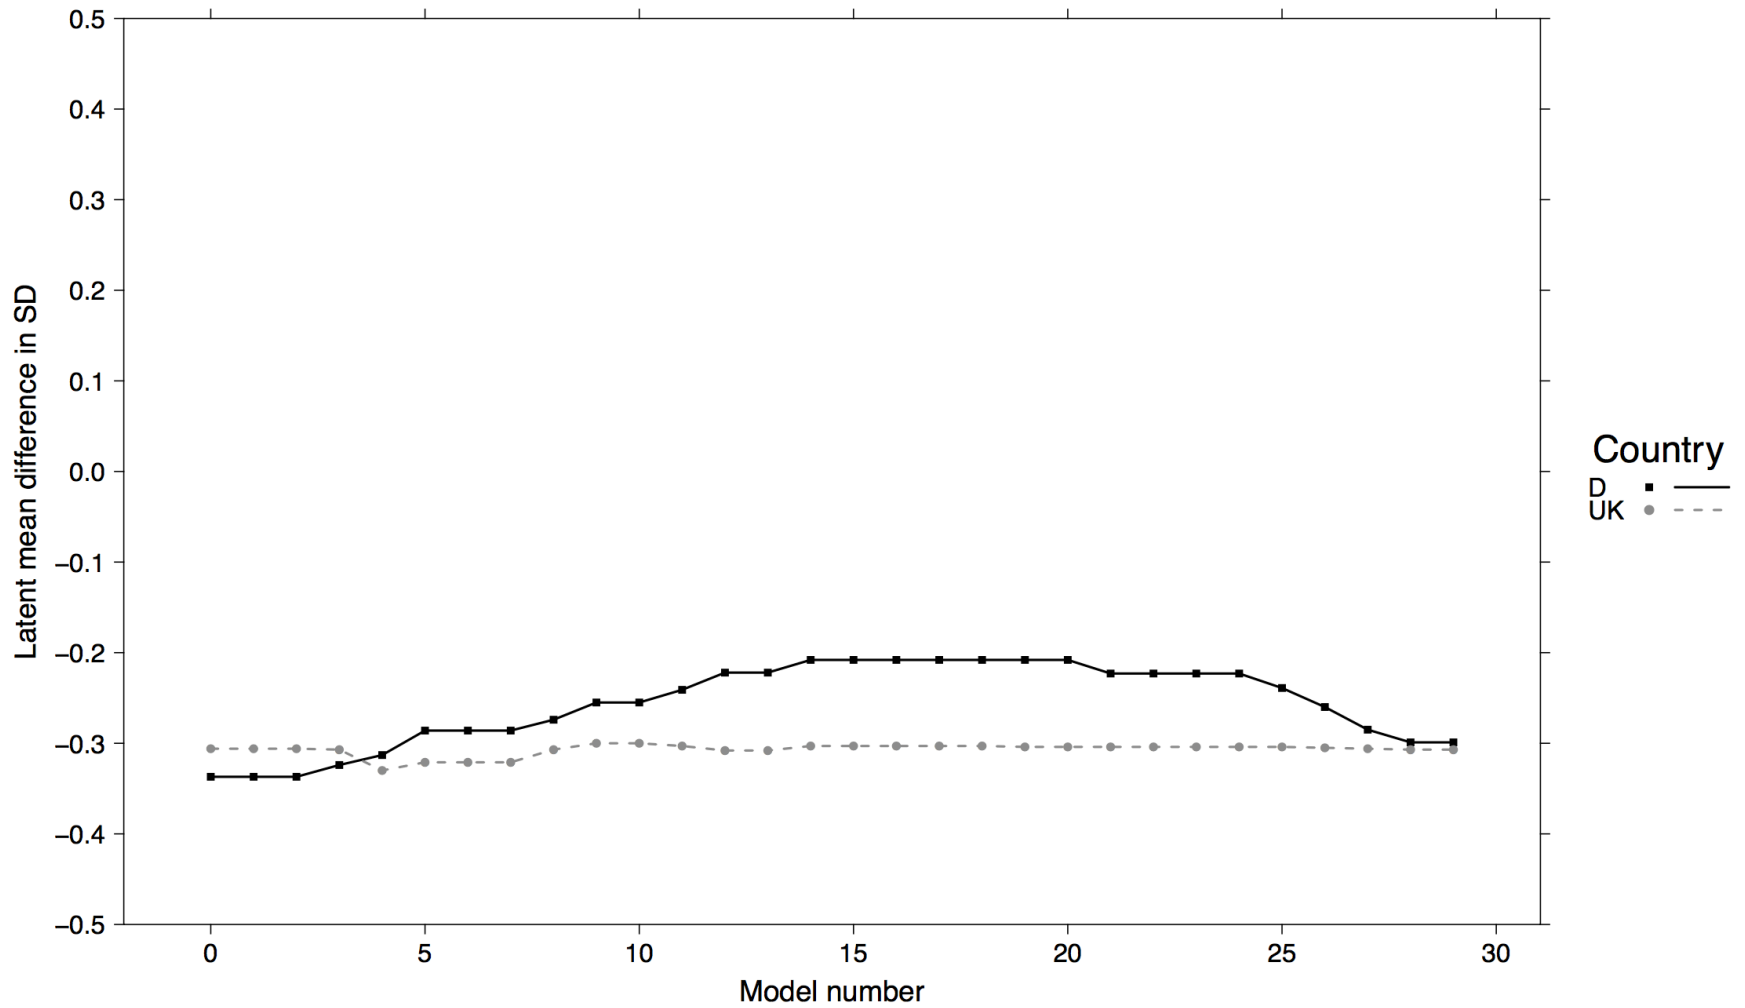

Figure S11. Development in latent mean differences from strict invariance model (model number 0) to final partial invariance model for the NARQ facet admiration by country.

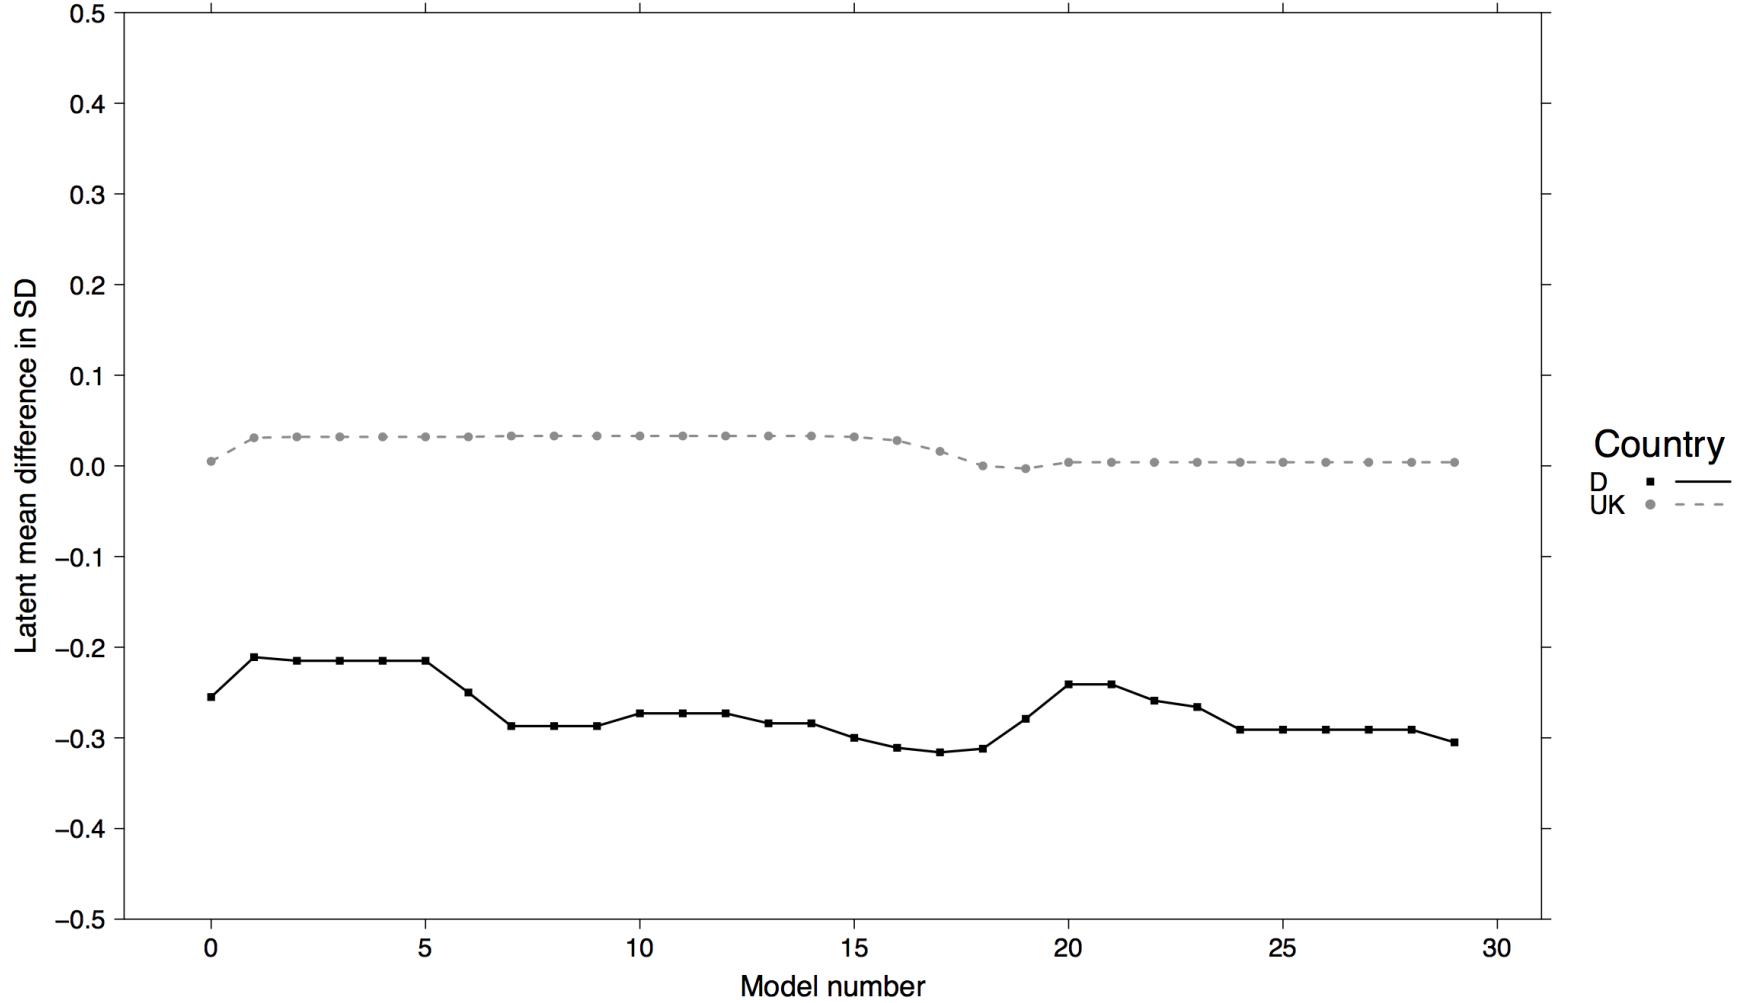

Figure S12. Development in latent mean differences from strict invariance model (model number 0) to final partial invariance model for the NARQ facet rivalry by country. Poland is not included because partial invariance was not achieved.
